# Supplementary material for: 238U–206Pb dating of U-series disequilibrium zircons by secondary ion mass spectrometry
Source: Royal Society of Chemistry journal article supplement (doi:10.1039/d0ja00510j), 2021-01-01
Supplement: d0ja00510j1.pdf [file d0ja00510j1.pdf]

The error propagation can be expressed as:

$$S_N = \sqrt{\left(\frac{\partial f}{\partial x_1}\right)^2 S_{x1}^2 + \left(\frac{\partial f}{\partial x_2}\right)^2 S_{x2}^2 + \left(\frac{\partial f}{\partial x_3}\right)^2 S_{x3}^2} \quad (4)$$

$$\sigma = \sqrt{\sum_{1 \leq i < j}^n \left(\left(\frac{\partial f}{\partial x_i}\right) \sigma_i\right)^2 + 2 \sum_{1 \leq i < j}^n \rho_{ij} \left(\frac{\partial f}{\partial x_i}\right) \left(\frac{\partial f}{\partial x_j}\right) \sigma_i \sigma_j} \quad (1)$$

where  $\rho_{ij}$  is the error correlation between the parameters of  $i$  and  $j$ . If all of parameters  $x_1, x_2, \dots, x_j$  are independent (i.e.  $\rho_{(x_i, x_j)} \approx 0$ ), the eqn(1) can be simplified as:

$$\sigma = \sqrt{\sum_{1 \leq i < j}^n \left(\left(\frac{\partial f}{\partial x_i}\right) \sigma_i\right)^2}.$$

In this study, the parameters includes  $(^{207}\text{Pb}/^{206}\text{Pb})_m$ ,  $(^{206}\text{Pb}/^{238}\text{U})_m$  and  $f_{\text{Th/U}}$ . Generally, the value and precision of  $(^{207}\text{Pb}/^{206}\text{Pb})_m$  here is mainly depended on  $^{207}\text{Pb}$  in common lead; the value and precision of  $(^{206}\text{Pb}/^{238}\text{U})_m$  is mainly depended on  $^{206}\text{Pb}$  in radiogenic lead; the uncertainty of  $f_{\text{Th/U}}$  is mainly related to the possible Th/U difference between magma and whole rock. Therefore, it is reasonable to ignore the correlation between different parameters in this study.

As  $f_{\text{Th/U}}$  represent the ratio of the D of U and Th, respectively between source and magma and zircon crystal, the  $f$  is defined as follows:

$$f_{\text{Th/U}} = \frac{D_{\text{Zircon/SourceMagma}}^{\text{Th}}}{D_{\text{Zircon/SourceMagma}}^{\text{U}}} \quad (2)$$

$(\text{D}/^{207}\text{Pb})_m$  can be calculated as following equation:

$$\left(\frac{^{207}\text{Pb}}{\text{D}}\right)_m = \left(\frac{^{207}\text{Pb}}{^{206}\text{Pb}}\right)_m * \left(1 / \left(1 + \left(\frac{^{238}\text{U}}{^{206}\text{Pb}_m}\right) \left(\frac{\lambda_{238}}{\lambda_{230}} (1 - e^{-\lambda_{230}t}) (1 - f_{\text{Th/U}})\right) e^{\lambda_{238}t}\right)\right) \quad (3)$$

$$-\left(\frac{^{207}\text{Pb}}{\text{D}}\right)_m = \left(\frac{^{207}\text{Pb}}{^{206}\text{Pb}}\right)_m * \left(1 / \left(1 + \left(\frac{^{206}\text{Pb}}{^{207}\text{Pb}_m}\right) \left(\frac{^{238}\text{U}}{^{206}\text{Pb}_m}\right) \left(\frac{\lambda_{238}}{\lambda_{230}} (1 - e^{-\lambda_{230}t}) (1 - f_{\text{Th/U}})\right) e^{\lambda_{238}t}\right)\right) \quad (3)$$

Where the subscript  $m$  represents the measured value and superscript  $*$  represents the ratio of radiogenic Pb.  $\lambda_{238}$  and  $\lambda_{230}$  are the decay constants of  $^{238}\text{U}$  and  $^{230}\text{Th}$  ( $\lambda_{238} = 1.55125 \times 10^{-10} \text{ yr}^{-1}$  and  $\lambda_{230} = 9.195 \times 10^{-6} \text{ yr}^{-1}$ ).

The error of  $(^{206}\text{Pb}/^{207}\text{Pb})_m$ ,  $(^{206}\text{Pb}/^{238}\text{U})$  and  $f_{\text{Th/U}}$  can be propagated into the error of  $(\text{D}/^{207}\text{Pb})_m$  ( $\sigma_{(\text{D}/^{207}\text{Pb})_m}$ ) as follow:

$$\frac{\partial_{(^{207}\text{Pb}/\text{D})_m}}{\partial_{(^{206}\text{Pb}/^{238}\text{U})_m}} = - \frac{e^{\lambda_{238}t} * \left(\frac{^{207}\text{Pb}}{^{206}\text{Pb}}\right)_m * (\lambda_{238}/\lambda_{230}) * (1 - f_{\text{Th}/\text{U}}) * (\exp(-\lambda_{230}t) - 1)}{\left(\left(\frac{^{206}\text{Pb}}{^{238}\text{U}}\right)_m\right)^2 * \left(\frac{e^{\lambda_{238}t} * (\lambda_{238}/\lambda_{230}) * (1 - f_{\text{Th}/\text{U}}) * (\exp(-\lambda_{230}t) - 1)}{\left(\frac{^{206}\text{Pb}}{^{238}\text{U}}\right)_m} - 1\right)^2} \quad (4)$$

$$\frac{\partial_{(^{207}\text{Pb}/\text{D})_m}}{\partial_{(^{207}\text{Pb}/^{206}\text{Pb})_m}} = - \frac{1}{\frac{e^{\lambda_{238}t} * (\lambda_{238}/\lambda_{230}) * (1 - f_{\text{Th}/\text{U}}) * (\exp(-\lambda_{230}t) - 1)}{\left(\frac{^{206}\text{Pb}}{^{238}\text{U}}\right)_m} - 1} \quad (5)$$

$$\frac{\partial_{(^{207}\text{Pb}/\text{D})_m}}{\partial_{f_{\text{Th}/\text{U}}}} = \frac{e^{\lambda_{238}t} * (\lambda_{238}/\lambda_{230}) * (1 - f_{\text{Th}/\text{U}}) * (\exp(-\lambda_{230}t) - 1)}{\left(\frac{^{206}\text{Pb}}{^{238}\text{U}}\right)_m * \left(\frac{e^{\lambda_{238}t} * (\lambda_{238}/\lambda_{230}) * (1 - f_{\text{Th}/\text{U}}) * (\exp(-\lambda_{230}t) - 1)}{\left(\frac{^{206}\text{Pb}}{^{238}\text{U}}\right)_m} - 1\right)^2} \quad (6)$$

$$\frac{\partial_{(^{207}\text{Pb}/\text{D})_m}}{\partial_{(^{206}\text{Pb}/^{238}\text{U})_m}} = - \frac{e^{-\lambda_{238}t} * \left(\frac{^{207}\text{Pb}}{^{206}\text{Pb}}\right)_m * (\lambda_{238}/\lambda_{230}) * (1 - f_{\text{Th}/\text{U}}) * (\exp(-\lambda_{230}t) - 1)}{\left(\left(\frac{^{206}\text{Pb}}{^{238}\text{U}}\right)_m\right)^2 * \left(\frac{e^{-\lambda_{238}t} * (\lambda_{238}/\lambda_{230}) * (1 - f_{\text{Th}/\text{U}}) * (\exp(-\lambda_{230}t) - 1)}{\left(\frac{^{206}\text{Pb}}{^{238}\text{U}}\right)_m} - 1\right)^2} \quad (4)$$

$$\frac{\partial_{(^{207}\text{Pb}/\text{D})_m}}{\partial_{(^{207}\text{Pb}/^{206}\text{Pb})_m}} = - \frac{1}{\frac{e^{-\lambda_{238}t} * (\lambda_{238}/\lambda_{230}) * (1 - f_{\text{Th}/\text{U}}) * (\exp(-\lambda_{230}t) - 1)}{\left(\frac{^{206}\text{Pb}}{^{238}\text{U}}\right)_m} - 1} \quad (5)$$

$$\frac{\partial_{(^{207}\text{Pb}/\text{D})_m}}{\partial_{f_{\text{Th}/\text{U}}}} = \frac{e^{-\lambda_{238}t} * (\lambda_{238}/\lambda_{230}) * (1 - f_{\text{Th}/\text{U}}) * (\exp(-\lambda_{230}t) - 1)}{\left(\frac{^{206}\text{Pb}}{^{238}\text{U}}\right)_m * \left(\frac{e^{-\lambda_{238}t} * (\lambda_{238}/\lambda_{230}) * (1 - f_{\text{Th}/\text{U}}) * (\exp(-\lambda_{230}t) - 1)}{\left(\frac{^{206}\text{Pb}}{^{238}\text{U}}\right)_m} - 1\right)^2} \quad (6)$$

$$\sigma_{(^{207}\text{Pb}/\text{D})_m} = \sqrt{\left(\frac{\partial_{(^{207}\text{Pb}/\text{D})_m}}{\partial_{(^{206}\text{Pb}/^{238}\text{U})_m}}\right)^2 \sigma_{(^{206}\text{Pb}/^{238}\text{U})_m}^2 + \left(\frac{\partial_{(^{207}\text{Pb}/\text{D})_m}}{\partial_{(^{207}\text{Pb}/^{206}\text{Pb})_m}}\right)^2 \sigma_{(^{207}\text{Pb}/^{206}\text{Pb})_m}^2 + \left(\frac{\partial_{(^{207}\text{Pb}/\text{D})_m}}{\partial_{f_{\text{Th}/\text{U}}}}\right)^2 \sigma_{f_{\text{Th}/\text{U}}}^2} \quad (7)$$

Similarly,  $\text{D}/^{238}\text{U}$  can be expressed as:

$$\frac{\text{D}}{^{238}\text{U}} = \left(\frac{^{206}\text{Pb}}{^{238}\text{U}}\right)_m + \frac{\lambda_{238}}{\lambda_{230}} (1 - e^{-\lambda_{238}t}) (1 - f_{\text{Th}/\text{U}}) e^{\lambda_{238}t} \quad (8)$$

The error of  $(^{206}\text{Pb}/^{207}\text{Pb})_m$  and  $f_{\text{Th}/\text{U}}$  can be propagated into the error of  $\text{D}/^{238}\text{U}$  ( $\sigma_{\text{D}/^{238}\text{U}}$ ) as follow:

$$\frac{\partial_{(\text{D}/^{238}\text{U})}}{\partial_{(^{206}\text{Pb}/^{238}\text{U})_m}} = 1 \quad (9)$$

$$\frac{\partial_{(\text{D}/^{238}\text{U})}}{\partial_{f_{\text{Th}/\text{U}}}} = - e^{\lambda_{238}t} * \lambda_{238}/\lambda_{230} * (\exp(-\lambda_{230}t) - 1) \quad (10)$$

$$\sigma_{(D/^{238}U)} = \sqrt{\left(\frac{\partial_{(D/^{238}U)}}{\partial_{(^{206}Pb/^{238}U)_m}}\right)^2 \sigma_{(^{206}Pb/^{238}U)_m}^2 + \left(\frac{\partial_{(D/^{238}U)}}{\partial_{f_{^{206}Pb}}}\right)^2 \sigma_{f_{^{206}Pb}}^2} \quad (11)$$

The proportion of common Pb relative to total  $^{206}Pb$  ( $f_{206}$ ) can be expressed as:

$$f_{206} = \frac{\left(\frac{^{207}Pb}{D}\right)_m - \left(\frac{^{207}Pb}{^{206}Pb}\right)^*}{\left(\frac{^{207}Pb}{^{206}Pb}\right)_c - \left(\frac{^{207}Pb}{^{206}Pb}\right)^*} \quad (12)$$

The error of  $(^{206}Pb/D)_m$  and  $(^{207}Pb/^{206}Pb)_c$  can be propagated into the error of  $f_{206}$  as follow:

$$\frac{\partial_{f_{206}}}{\partial_{(^{207}Pb/D)_m}} = \frac{1}{\left(\frac{^{207}Pb}{^{206}Pb}\right)_c - \left(\frac{^{207}Pb}{^{206}Pb}\right)^*} \quad (13)$$

$$\frac{\partial_{f_{206}}}{\partial_{(^{207}Pb/^{206}Pb)_c}} = - \frac{\left(\frac{^{207}Pb}{D}\right)_m - \left(\frac{^{207}Pb}{^{206}Pb}\right)^*}{\left(\left(\frac{^{207}Pb}{^{206}Pb}\right)_c - \left(\frac{^{207}Pb}{^{206}Pb}\right)^*\right)^2} \quad (14)$$

$$\sigma_{f_{206}} = \sqrt{\left(\frac{\partial_{f_{206}}}{\partial_{(^{207}Pb/D)_m}}\right)^2 \sigma_{(^{207}Pb/D)_m}^2 + \left(\frac{\partial_{f_{206}}}{\partial_{(^{207}Pb/^{206}Pb)_c}}\right)^2 \sigma_{(^{207}Pb/^{206}Pb)_c}^2} \quad (15)$$

The age (t) can be calculated as follow:

$$t = \ln((D/^{238}U)^*(1 - f_{206}) + 1) / \lambda_{238} \quad (16)$$

The uncertainty of age (t) ( $\sigma_t$ ) can be propagated with the error of  $f_{206}$  and  $D/^{238}U$ :

$$\frac{\partial_t}{\partial_{(D/^{238}U)}} = \frac{f_{206} - 1}{\lambda_{238} \left(\frac{D}{^{238}U} (f_{206} - 1) - 1\right)} \quad (17)$$

$$\frac{\partial_t}{\partial_{f_{206}}} = \frac{\frac{D}{^{238}U}}{\lambda_{238} \left(\frac{D}{^{238}U} (f_{206} - 1) - 1\right)} \quad (18)$$

$$\sigma_t = \sqrt{\left(\frac{\partial_t}{\partial_{(D/^{238}U)}}\right)^2 \sigma_{(D/^{238}U)}^2 + \left(\frac{\partial_t}{\partial_{f_{206}}}\right)^2 \sigma_{f_{206}}^2} \quad (19)$$
