# Supplementary material for: 238U–206Pb dating of U-series disequilibrium zircons by secondary ion mass spectrometry
Source: Royal Society of Chemistry journal article supplement (doi:10.1039/d0ja00510j), 2021-01-01
Supplement: d0ja00510j3.xlsx [file d0ja00510j3.xlsx]

## Sheet: Sheet1
Sample NO.	238U/206Pb	1σ/%	207Pb/206Pb	1σ/%	f206	Th/U	fTh/U	U(ppm)	206Pb (ppm)	206Pbc (ppb)	Pbc (ppb)	204Pbc (ppb)		Corrected Time (ka)	2σ/ka		Age(none 76)	2σ/ka
10SU03@1	28212.7	2.96967	0.159705	4.23169	0.0932098	0.784666	0.245208	811.538	0.0248974	1.57153	6.28613	0.0873074		275.726	26.2536		260.541	7.54004
10SU03@02	13130.4	8.67696	0.401129	11.2362	0.370077	0.500676	0.156461	687.045	0.0452894	14.1914	56.7657	0.788412		365.024	83.1608		320.317	73.4434
10SU03@03	42260.5	2.16164	0.250942	6.08614	0.166815	0.939708	0.293659	832.875	0.0170583	1.9863	7.9452	0.11035		178.72	24.0754		159.146	10.8034
10SU03@04	22387.5	5.33681	0.430688	5.18973	0.371195	0.652433	0.203885	297.543	0.0115036	3.41714	13.6686	0.189841		228.862	34.0316		187.638	30.2188
10SU03@05	15277.3	3.04625	0.23075	4.50513	0.187547	0.861081	0.269088	790.631	0.0447936	6.92268	27.6907	0.384593		405.843	35.8676		383.323	19.6298
10SU03@06	14172.7	2.24534	0.101038	3.2294	0.048444	0.5512	0.17225	1629.75	0.0995312	3.32968	13.3187	0.184982		517.717	26.8174		506.396	6.52065
10SU03@07	14409.6	5.00723	0.130006	15.7617	0.0795518	0.658714	0.205848	123.765	0.00743427	0.450188	1.80075	0.0250104		490.382	51.8598		476.431	28.4006
10SU03@08	19110.3	2.70471	0.0845429	6.96411	0.0338554	1.56109	0.487841	368.071	0.0166708	0.378907	1.51563	0.0210504		378.044	53.2092		372.322	6.27586
10SU03@09	15836.8	2.28444	0.0857645	6.65151	0.0363701	1.43014	0.44692	354.549	0.0193776	0.498931	1.99573	0.0277184		449.263	50.09		442.901	7.31508
10SU03@10	67152.4	2.53286	0.190238	4.57702	0.0959443	0.988071	0.308772	782.037	0.0100799	0.558414	2.23365	0.031023		135.128	22.553		122.324	4.73682
10SU03@11	50394.1	5.12602	0.294765	12.0379	0.18237	0.549095	0.171592	301.322	0.00517538	0.619565	2.47826	0.0344203		161.578	20.6262		135.712	19.3083
10SU03@12	16702.2	1.719	0.136292	6.51342	0.080038	0.379157	0.118486	1410.16	0.0730779	4.19518	16.7807	0.233065		441.73	19.6436		425.588	12.749
10SU03@13	39740.3	8.25407	0.367594	9.29262	0.280918	0.926655	0.28958	319.99	0.0069694	1.45858	5.83431	0.0810321		159.366	31.7962		131.868	22.1694
10SU03@14	13310.1	2.3892	0.0956453	8.49505	0.0453518	0.813646	0.254264	174.3	0.0113346	0.367966	1.47186	0.0204425		539.215	35.9452		529.552	12.385
10SU03@15	28265.7	6.84045	0.220818	18.4927	0.15508	0.924136	0.288792	94.9816	0.00290851	0.333542	1.33417	0.0185301		251.577	43.488		232.21	31.7213
10SU03@16	48726.1	11.2746	0.456246	11.8714	0.338628	0.660694	0.206467	308.951	0.00548805	1.34356	5.37425	0.0746424		126.784	30.8636		92.6572	28.9776
10SU03@17	32764.7	3.68595	0.13446	8.24935	0.0638448	0.701699	0.219281	290.069	0.00766276	0.284595	1.13838	0.0158108		256.124	25.2876		243.126	8.55351
10SU03@18	14384	5.42278	0.238458	5.06954	0.199147	0.933863	0.291832	163.458	0.00983595	1.64054	6.56215	0.091141		419.273	50.6048		396.661	22.5724
10SU03@19	15358.7	2.65173	0.114281	15.8026	0.0620824	0.706713	0.220848	267.436	0.0150715	0.67796	2.71184	0.0376644		472.088	36.317		460.083	23.5366
10SU03@20	13515.7	1.65601	0.120164	0.070714	0.070714	0.703867	0.219959	1406.62	0.0900804	4.85891	19.4356	0.26994		521.389	28.5948		508.693	12.5047
10SU03@21	95351.5	5.53096	0.418181	9.63747	0.281349	1.00331	0.313535	206.418	0.00187375	0.360342	1.44137	0.020019		75.4202	16.6276		55.7573	12.3249
10SU03@22	40929.9	2.26318	0.131029	4.23426	0.0540835	0.670948	0.209671	972.264	0.0205605	0.552062	2.20825	0.0306701		219.473	20.1952		207.187	4.50539
10SU03@23	20681.1	2.38336	0.152348	7.40414	0.0955257	0.810628	0.253321	1051.47	0.044006	3.07722	12.3089	0.170956		352.493	29.546		337.545	12.877
Sample NO.	238U/206Pb	1σ/%	207Pb/206Pb	1σ/%	f206	Th/U	fTh/U	U(ppm)	206Pb (ppm)	206Pbc (ppb)	Pbc (ppb)	204Pbc (ppb)		Corrected Time (ka)	2σ/ka		Age(none 76)	2σ/ka
14SU51@1	45436.4	3.39405	0.157597	3.20554	0.0730329	0.637958	0.199362	703.548	0.0134023	0.09039	0.36156	0.00502167		199.313	19.4532		184.807	4.68657
14SU51@2	20673.5	3.45473	0.286618	19.4893	0.234336	0.889496	0.277967	161.407	0.00613504	0.100975	0.403901	0.00560974		294.87	34.7752		268.427	25.0743
14SU51@3	10561.9	2.07539	0.0629506	7.08896	0.013828	1.31377	0.410553	763.559	0.00757289	0.0766801	0.30672	0.00426		664.949	51.081		659.927	4.54371
14SU51@4	29995	4.92374	0.141408	19.9308	0.0754239	0.875996	0.273749	203.771	0.00558097	0.105365	0.421461	0.00585363		265.361	33.8328		252.537	14.595
14SU51@5	26668.3	3.70766	0.171732	7.79653	0.107494	0.836663	0.261457	371.276	0.0158818	0.226514	0.906055	0.0125841		282.061	30.7006		266.006	14.2586
14SU51@6	16978.4	6.46391	0.105831	11.1469	0.0537168	0.992125	0.310039	161.928	0.00770234	0.408259	1.63304	0.0226811		428.902	58.3498		419.123	19.1456
14SU51@7	34396.4	2.79167	0.124338	14.9702	0.0514587	0.566745	0.177108	429.62	0.00207705	0.071934	0.287736	0.00399633		254.475	20.731		241.827	10.8217
14SU51@8	17164.5	3.41387	0.15648	5.33052	0.113056	1.46308	0.457211	185.285	0.121353	0.508752	2.03501	0.028264		383.916	50.0782		372.649	11.2213
14SU51@9	17760.6	2.36357	0.0827793	11.8748	0.0267511	0.685788	0.214309	1110.8	0.00654351	0.129679	0.518715	0.00720437		434.872	28.033		426.156	3.81346
14SU51@10	26449.8	2.99095	0.108075	5.50162	0.0443732	0.684655	0.213955	187.477	0.0194534	0.119776	0.479102	0.0066542		309.863	28.4912		298.92	17.4974
14SU51@11	22067.9	4.42951	0.134409	7.30626	0.0760281	0.830907	0.259659	193.078	0.00675771	0.166277	0.665107	0.0092376		341.059	35.6386		328.044	10.2597
14SU51@12	18769.1	3.82204	0.0928944	3.89913	0.0422022	1.4474	0.452311	121.021	0.0625735	0.24679	0.98716	0.0137106		384.337	54.855		377.597	18.9508
14SU51@13	19657.9	3.73324	0.167057	13.6297	0.113022	0.887746	0.277421	360.7	0.00588009	0.0958202	0.383281	0.00532334		357.964	36.1978		342.069	15.3409
14SU51@14	16138.6	4.71914	0.398704	9.35582	0.378438	1.29038	0.403245	143.615	0.0120501	0.18454	0.738158	0.0102522		285.692	63.172		255.477	57.525
14SU51@15	54154.7	5.96342	0.289212	15.4404	0.19229	0.995119	0.310975	129.955	0.00825496	0.130233	0.520934	0.00723519		139.959	27.443		120.208	20.0456
14SU51@16	13656.9	1.81196	0.0747411	12.2531	0.0217642	0.667813	0.208691	1914.75	0.0108109	0.119242	0.476969	0.00662456		545.354	28.1876		537.346	6.14318
14SU51@17	63114.8	3.23121	0.123504	4.84798	0.0561578	1.64305	0.513452	477.147	0.00934329	0.137255	0.549019	0.00762527		131.428	38.3446		125.663	5.42142
14SU51@18	22911.5	2.5583	0.0997378	2.99089	0.0405845	0.822678	0.257087	514.944	0.0541339	0.181011	0.724045	0.0100562		344.174	29.607		334.476	5.82419
